# Supplementary material for: One-step solvothermal synthesis of the bimetallic Zr/Ce-UiO-67 metal–organic framework: a visible-light-activated photocatalyst for Cr(vi) detoxification
Source: Royal Society of Chemistry journal article supplement (doi:10.1039/d3nj00610g), 2023-01-01
Supplement: d3nj00610g1.pdf [file d3nj00610g1.pdf]

# One-step solvothermal synthesis of bimetallic Zr/Ce-UiO-67 metal-organic framework: A visible-light-active photocatalyst for Cr(VI) detoxification

Moein Darabi Goudarzi, Mahsa Bigham Sabouti, Negin Khosroshahi, Vahid Safarifard\*

Department of Chemistry, Iran University of Science and Technology, Tehran 16846-13114, Iran,

E-mail: vsafarifard@iust.ac.ir

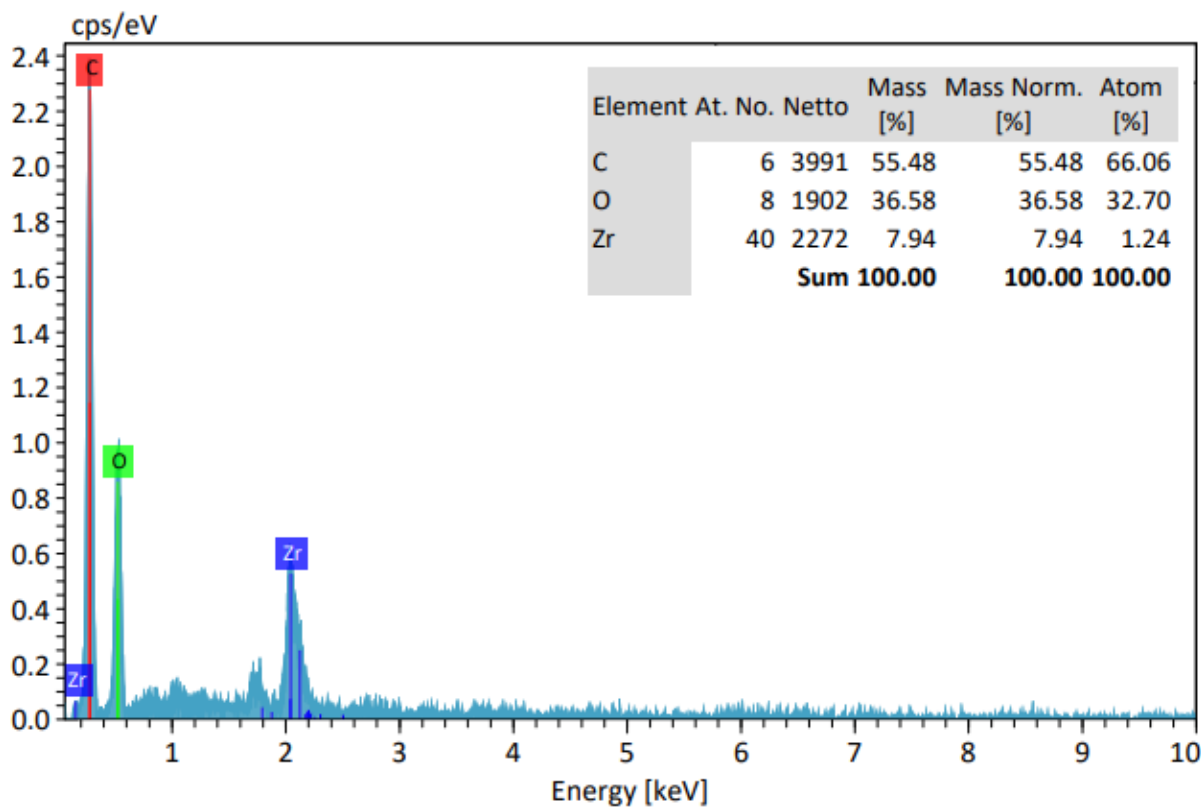

Figure S 1. EDS analysis of Zr-UiO-67.

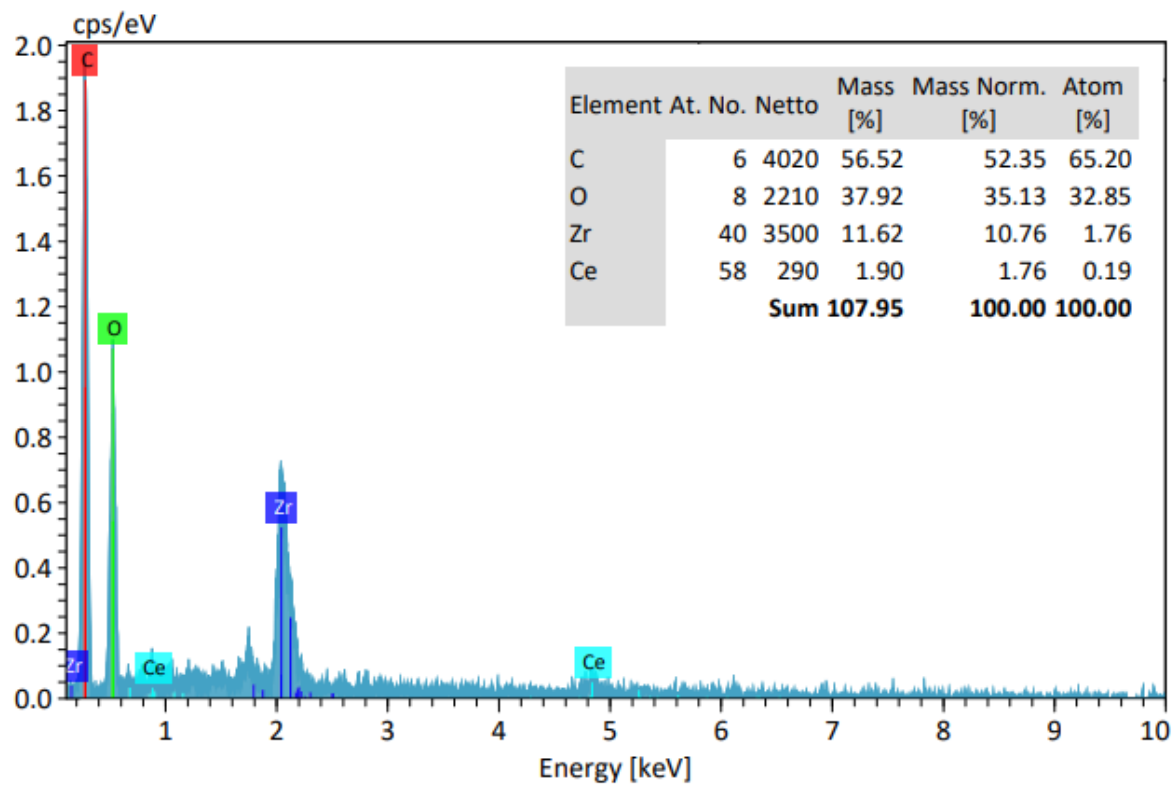

Figure S 2. EDS analysis of Zr/Ce-UiO-67(1:3).
